# Supplementary material
Source: HighWire-hosted journal article supplement (https://erj.ersjournals.com/content/54/5/1900108)
Supplement: inline-supplementary-material-1 [file inline-supplementary-material-1.pdf]

## Online supplement

### Defining severe obstructive lung disease in the biologic era: an endotype-based approach

SUPPLEMENTARY FIGURE S1 Search strategy to identify publications on clinical trials of biologic therapies in severe obstructive lung disease

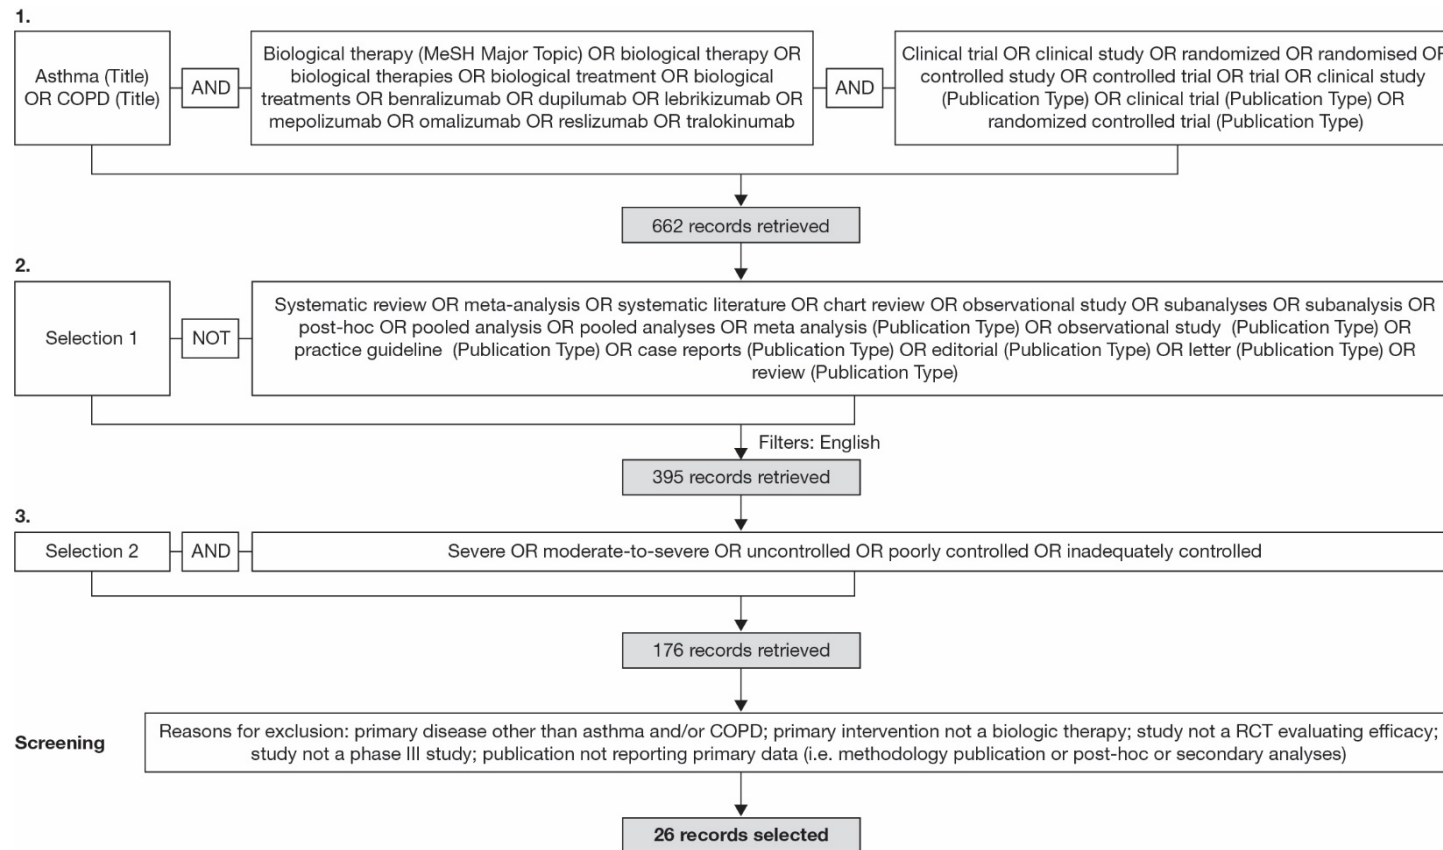

COPD: chronic obstructive pulmonary disease; MeSH: Medical Subject Headings; RCT: randomised controlled trial.

Search conducted in PubMed for articles published through 22 May 2019. All search terms were for Title/Abstract field unless otherwise stated in parentheses. For each specific biologic therapy, search also included all experimental and brand names.

SUPPLEMENTARY TABLE S1 GINA-defined low, medium and high daily doses of inhaled corticosteroids

**Low dose ICS** provides most of the clinical benefit for most patients. However, ICS responsiveness varies between patients, so some patients may need **medium dose ICS** if asthma is uncontrolled despite good adherence and correct inhaler technique with low dose ICS. **High dose ICS** is needed by very few patients, and its long-term use is associated with an increased risk of local and systemic side-effects.

This is not a table of equivalence, but estimated clinical comparability, based on available studies and product information.

| Inhaled corticosteroid                         | Adults and adolescents |            |       |
|------------------------------------------------|------------------------|------------|-------|
|                                                | Low                    | Medium     | High  |
| Beclomethasone dipropionate (CFC) <sup>#</sup> | 200–500                | >500–1000  | >1000 |
| Beclomethasone dipropionate (HFA)              | 100–200                | >200–400   | >400  |
| Budesonide (DPI)                               | 200–400                | >400–800   | >800  |
| Ciclesonide (HFA)                              | 80–160                 | >160–320   | >320  |
| Fluticasone furoate (DPI)                      | 100                    | n/a        | 200   |
| Fluticasone propionate (DPI)                   | 100–250                | >250–500   | >500  |
| Fluticasone propionate (HFA)                   | 100–250                | >250–500   | >500  |
| Mometasone furoate                             | 110–220                | >220–440   | >440  |
| Triamcinolone acetonide                        | 400–1000               | >1000–2000 | >2000 |
| Inhaled corticosteroid                         | Children 6–11 years    |            |       |
|                                                | Low                    | Medium     | High  |
| Beclomethasone dipropionate (CFC) <sup>#</sup> | 100–200                | >200–400   | >400  |
| Beclomethasone dipropionate (HFA)              | 50–100                 | >100–200   | >200  |
| Budesonide (DPI)                               | 100–200                | >200–400   | >400  |
| Ciclesonide (HFA)                              | 80                     | >80–160    | >160  |
| Fluticasone propionate (DPI)                   | 100–200                | >200–400   | >400  |
| Fluticasone propionate (HFA)                   | 100–200                | >200–500   | >500  |
| Mometasone furoate                             | 110                    | ≥220–<440  | ≥440  |
| Triamcinolone acetonide                        | 400–800                | >800–1200  | >1200 |

Doses are in µg. CFC: chlorofluorocarbon propellant; DPI: dry-powder inhaler; GINA: Global Initiative for Asthma; HFA: hydrofluoroalkane propellant; ICS: inhaled corticosteroid; n/a: not applicable.

<sup>#</sup>Included for comparison with older literature.

Reproduced with permission from GINA Pocket Guide for Asthma Management and Prevention 2019 [1].

SUPPLEMENTARY TABLE S2 Design of phase II RCTs of biologic therapies in severe COPD

| <b>Trial (treatment)</b>                              | <b>Authors' description of target population</b> | <b>Severity/control</b>                                                                                                                                           | <b>Current treatment</b> | <b>Bronchodilator reversibility requirement (see footnotes)</b> | <b>Eosinophilic status</b>     | <b>FeNO requirement</b> | <b>Allergy/atopy requirement</b> | <b>Notable exclusions</b>                                                                                                                      | <b>Primary end-point</b>                |
|-------------------------------------------------------|--------------------------------------------------|-------------------------------------------------------------------------------------------------------------------------------------------------------------------|--------------------------|-----------------------------------------------------------------|--------------------------------|-------------------------|----------------------------------|------------------------------------------------------------------------------------------------------------------------------------------------|-----------------------------------------|
| Rennard et al [4]<br>(infliximab [anti-TNF])          | Moderate-to-severe COPD                          | Post-bronchodilator FEV <sub>1</sub> ≥30% and <80% predicted (GOLD 2007 criteria [5]); ≥1 episode of COPD-related symptoms in past 2 months; CRQ score <120       | n/a                      | <20% <sup>#</sup>                                               | n/a                            | n/a                     | n/a                              | OCS use within 2 weeks of screening; smoking history <10 pack-years; asthma as the main component of obstructive airway disease; age <40 years | Change from baseline in CRQ total score |
| Brightling et al [6]<br>(benralizumab)<br>NCT01227278 | Moderate-to-severe COPD with sputum eosinophilia | Post-bronchodilator FEV <sub>1</sub> ≥30% and <80% predicted (GOLD 2014 criteria [7]); ≥1 exacerbation requiring OCS, antibiotics or hospitalisation in past year | n/a                      | n/a                                                             | Sputum eosinophil count of ≥3% | n/a                     | n/a                              | Smoking history <10 pack-years; additional clinically significant pulmonary disease or asthma; age <40 years                                   | Moderate/severe AER                     |

| <b>Trial (treatment)</b>                                      | <b>Authors' description of target population</b> | <b>Severity/control</b>                                                                                                                                                                                        | <b>Current treatment</b>     | <b>Bronchodilator reversibility requirement (see footnotes)</b> | <b>Eosinophilic status</b> | <b>FeNO requirement</b> | <b>Allergy/atopy requirement</b> | <b>Notable exclusions</b>                                                                                                            | <b>Primary end-point</b>                                    |
|---------------------------------------------------------------|--------------------------------------------------|----------------------------------------------------------------------------------------------------------------------------------------------------------------------------------------------------------------|------------------------------|-----------------------------------------------------------------|----------------------------|-------------------------|----------------------------------|--------------------------------------------------------------------------------------------------------------------------------------|-------------------------------------------------------------|
| Calverley et al [8]<br>(MEDI8968 [anti-IL-1R])<br>NCT01448850 | Moderate-to-very severe COPD                     | Post-bronchodilator FEV <sub>1</sub> <80% predicted (GOLD 2011 criteria); ≥2 exacerbations requiring OCS, antibiotics, ER visit or hospitalisation in the past year; EXACT score ≥2 for 7 of the past 14 days  | Standard maintenance therapy | n/a                                                             | n/a                        | n/a                     | n/a                              | Smoking history <10 pack-years; other significant pulmonary disease as primary diagnosis; current diagnosis of asthma; age <45 years | Moderate/severe AER                                         |
| Eich et al [9]<br>(CNT0 6785 [anti-IL-17A])<br>NCT01966549    | Symptomatic moderate-to-severe COPD              | Post-bronchodilator FEV <sub>1</sub> ≥40% and <80% predicted; ≥2 exacerbations requiring OCS or antibiotics in past 2 years; persistent COPD symptoms requiring repeated rescue medication; chronic bronchitis | LABA and/or LAMA ± ICS       | n/a                                                             | n/a                        | n/a                     | n/a                              | Other pulmonary disease such as asthma; age <40 years                                                                                | Change from baseline in pre-bronchodilator FEV <sub>1</sub> |

Published phase II RCTs were identified from PubMed.

AER: annual exacerbation rate; COPD: chronic obstructive pulmonary disease; CRQ: Chronic Respiratory Questionnaire; EXACT: EXAcerbations of Chronic pulmonary disease Tool; FeNO: fractional exhaled nitric oxide; FEV<sub>1</sub>: forced expiratory volume in 1 s; GOLD: Global Initiative for Chronic Obstructive Lung Disease; ICS: inhaled corticosteroid; IgE: immunoglobulin E; IL-17A: interleukin-17A; IL-1R: interleukin-1 receptor; n/a: not applicable (not mentioned in inclusion/exclusion criteria); LABA: long-acting β<sub>2</sub>-agonist; LAMA: long-acting muscarinic antagonist; mMRC: modified Medical Research Council dyspnoea scale; OCS: oral corticosteroid; RCT, randomised controlled trial; TNF: tumour necrosis factor inhibitor.

#: <20% reversibility and FEV<sub>1</sub> variability ≤20% between screening and baseline visits.

## References

1. Global Initiative for Asthma. Pocket guide for asthma management and prevention (updated 2019). <http://ginasthma.org>. Date last accessed: April 18, 2019.
2. AstraZeneca. Efficacy and safety of benralizumab in moderate to very severe chronic obstructive pulmonary disease (COPD) with exacerbation history (TERRANOVA). <https://clinicaltrials.gov/ct2/show/NCT02155660>. Date last accessed: March 1, 2019.
3. AstraZeneca. Benralizumab efficacy in moderate to very severe chronic obstructive pulmonary disease (COPD) with exacerbation history (GALATHEA). <https://clinicaltrials.gov/ct2/show/NCT02138916>. Date last accessed: March 1, 2019.
4. Rennard SI, Fogarty C, Kelsen S, Long W, Ramsdell J, Allison J, Mahler D, Saadeh C, Siler T, Snell P, Korenblat P, Smith W, Kaye M, Mandel M, Andrews C, Prabhu R, Donohue JF, Watt R, Lo KH, Schlenker-Herceg R, Barnathan ES, Murray J, COPD Investigators. The safety and efficacy of infliximab in moderate to severe chronic obstructive pulmonary disease. *Am J Respir Crit Care Med* 2007; 175: 926-934.
5. Rabe KF, Hurd S, Anzueto A, Barnes PJ, Buist SA, Calverley P, Fukuchi Y, Jenkins C, Rodriguez-Roisin R, van Weel C, Zielinski J, Global Initiative for Chronic Obstructive Lung Disease. Global strategy for the diagnosis, management, and prevention of chronic obstructive pulmonary disease: GOLD executive summary. *Am J Respir Crit Care Med* 2007; 176: 532-555.
6. Brightling CE, Bleecker ER, Panettieri RA, Jr., Bafadhel M, She D, Ward CK, Xu X, Birrell C, van der Merwe R. Benralizumab for chronic obstructive pulmonary disease and sputum eosinophilia: a randomised, double-blind, placebo-controlled, phase 2a study. *Lancet Respir Med* 2014; 2: 891-901.

7. Global Initiative for Chronic Obstructive Lung Disease. Global strategy for the diagnosis, management, and prevention of chronic obstructive pulmonary disease (2014 report).  
<http://www.goldcopd.org>. Date last accessed: February 7, 2014.
8. Calverley PMA, Sethi S, Dawson M, Ward CK, Finch DK, Penney M, Newbold P, van der Merwe R. A randomised, placebo-controlled trial of anti-interleukin-1 receptor 1 monoclonal antibody MEDI8968 in chronic obstructive pulmonary disease. *Respir Res* 2017; 18: 153.
9. Eich A, Urban V, Jutel M, Vlcek J, Shim JJ, Trofimov VI, Liam CK, Kuo PH, Hou Y, Xiao J, Branigan P, O'Brien CD. A randomized, placebo-controlled phase 2 trial of CNTO 6785 in chronic obstructive pulmonary disease. *COPD* 2017; 14: 476-483.
